# Supplementary material for: Fluorescence probe for real-time malonaldehyde detection in epilepsy model
Source: Royal Society of Chemistry journal article supplement (doi:10.1039/d3an01583a), 2023-11-28
Supplement: d3an01583a1.pdf [file d3an01583a1.pdf]

## Fluorescence Probe for Real-Time Malonaldehyde Detection in epilepsy model

Yongtao Duan<sup>a,1\*</sup>, Zhenling Liu<sup>a,1</sup>, Yi-Fan Liao<sup>a,b,1</sup>, Mingzhu Wang<sup>a</sup>, Yongfang Yao<sup>c\*</sup>, Hai-Liang Zhu<sup>a,b\*</sup>,

<sup>a</sup>Henan Provincial Key Laboratory of Pediatric Hematology, Children's Hospital Affiliated to Zhengzhou University, Zhengzhou University, Zhengzhou 450018, China

<sup>b</sup>State Key Laboratory of Pharmaceutical Biotechnology, School of Life Sciences, Nanjing University, Nanjing, 210023, China

<sup>c</sup>School of Pharmaceutical Science, Zhengzhou University, Zhengzhou, Henan 450001, China

<sup>1</sup>These authors contributed equally.

\*Corresponding authors: Yongtao Duan (duanyongtao860409@163.com), Hai-Liang Zhu (zhuhl@nju.edu.cn), Yongfang Yao (yongfangyao@zzu.edu.cn)

## 1. Supporting tables

**Table S1.** Abbreviation Index

| Abbreviations | Full name                              |
|---------------|----------------------------------------|
| Ala           | Alanine                                |
| CCK-8         | Cell Counting Kit-8                    |
| CLSM          | Confocal Laser Scanning Microscopy     |
| CTAB          | Cetrimonium Bromide                    |
| DL            | detection limit                        |
| DMEM          | Dulbecco's Modified Eagle Medium       |
| DMSO          | dimethyl sulfoxide                     |
| EA            | ethyl acetate                          |
| FBS           | fetal bovine serum                     |
| FQY           | fluorescence quantum yield             |
| GC            | gas chromatography                     |
| Gly           | Glycine                                |
| GSH           | Glutathione                            |
| Hcy           | Homocysteine                           |
| HPLC          | high-performance liquid chromatography |
| KA            | kainic acid                            |
| MDA           | malondialdehyde                        |
| MS            | mass spectrometry                      |
| PBS           | Phosphate Buffer Saline                |
| PC12          | Pheochromocytoma cells-12              |
| PE            | petroleum ether                        |
| ROS           | reactive oxygen species                |
| TBA           | thiobarbituric acid                    |
| TLC           | thin—layer chromatography              |
| Val           | Valine                                 |

**Table S2.** Chemicals Index

| Chemicals                                                | Source                             |
|----------------------------------------------------------|------------------------------------|
| 2-(3,5,5-trimethylcyclohex-2-en-1-ylidene) malononitrile | Energy Chemical                    |
| 4-amino-3-nitrobenzaldehyde                              | Energy Chemical                    |
| ethanol                                                  | XiLONG SCIENTIFIC                  |
| pyridine                                                 | Sinopharm Chemical Reagent Co.,Ltd |
| iron powder                                              | Energy Chemical                    |
| hydrochloric acid(HCl)                                   | Sinopharm Chemical Reagent Co.,Ltd |
| petroleum ether(PE)                                      | China Petrochemical Corporation    |
| ethyl acetate(EA)                                        | China Petrochemical Corporation    |
| dimethyl sulfoxide(DMSO)                                 | XiLONG SCIENTIFIC                  |
| benzaldehyde                                             | Energy Chemical                    |
| formaldehyde                                             | Energy Chemical                    |
| acetaldehyde                                             | Energy Chemical                    |
| n-propanal                                               | Energy Chemical                    |
| p-chlorobenzaldehyde                                     | Energy Chemical                    |
| NaCl                                                     | Energy Chemical                    |
| KCl                                                      | Energy Chemical                    |
| CaCl <sub>2</sub>                                        | Energy Chemical                    |
| ZnCl <sub>2</sub>                                        | Energy Chemical                    |
| FeCl <sub>3</sub>                                        | Energy Chemical                    |
| CH <sub>3</sub> COONa                                    | Energy Chemical                    |
| Na <sub>2</sub> CO <sub>3</sub>                          | Energy Chemical                    |
| Na <sub>2</sub> SO <sub>3</sub>                          | Energy Chemical                    |
| NaHSO <sub>3</sub>                                       | Energy Chemical                    |
| Na <sub>2</sub> S                                        | Energy Chemical                    |
| HClO <sub>4</sub>                                        | Energy Chemical                    |
| Alanine (Ala)                                            | Energy Chemical                    |
| Homocysteine(Hcy)                                        | Energy Chemical                    |
| Glutathione(GSH)                                         | Energy Chemical                    |
| Glycine(Gly)                                             | Energy Chemical                    |
| Valine(Val)                                              | Energy Chemical                    |
| H <sub>2</sub> O <sub>2</sub>                            | Sinopharm Chemical Reagent Co.,Ltd |
| Sodium Hydroxide(NaOH)                                   | XiLONG SCIENTIFIC                  |
| Cetrimonium Bromide(CTAB)                                | Energy Chemical                    |
| Rhodamine B                                              | Energy Chemical                    |
| Cell Counting Kit-8                                      | Sigma-Aldrich                      |
| kainic acid(KA)                                          | Sigma-Aldrich                      |
| malondialdehyde (MDA)                                    | Energy Chemical                    |
| Hoechst 33342 Live Cell Stain (100X)                     | Beyotime                           |
| L-carnosine                                              | Sigma-Aldrich                      |

### 3. Supporting Figures

Spectrum from 20210421\_LZ\_304.wiff (sample 1) - 20210421\_LZ\_304, Experiment 1, +TOF MS (100 - 1500) from 6.440 to 6.470 min

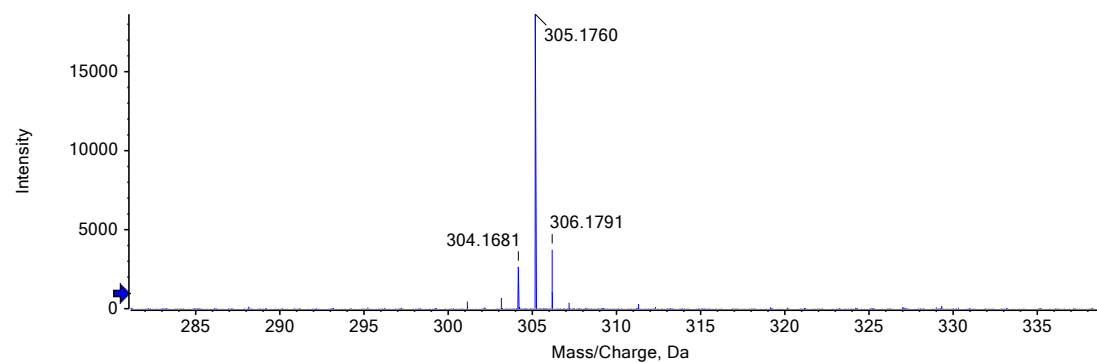

**Figure S1.** The mass spectrometry (MS) value calculated for  $C_{19}H_{20}N_4 [M+H]^+$  305.1761 and found 305.1760.

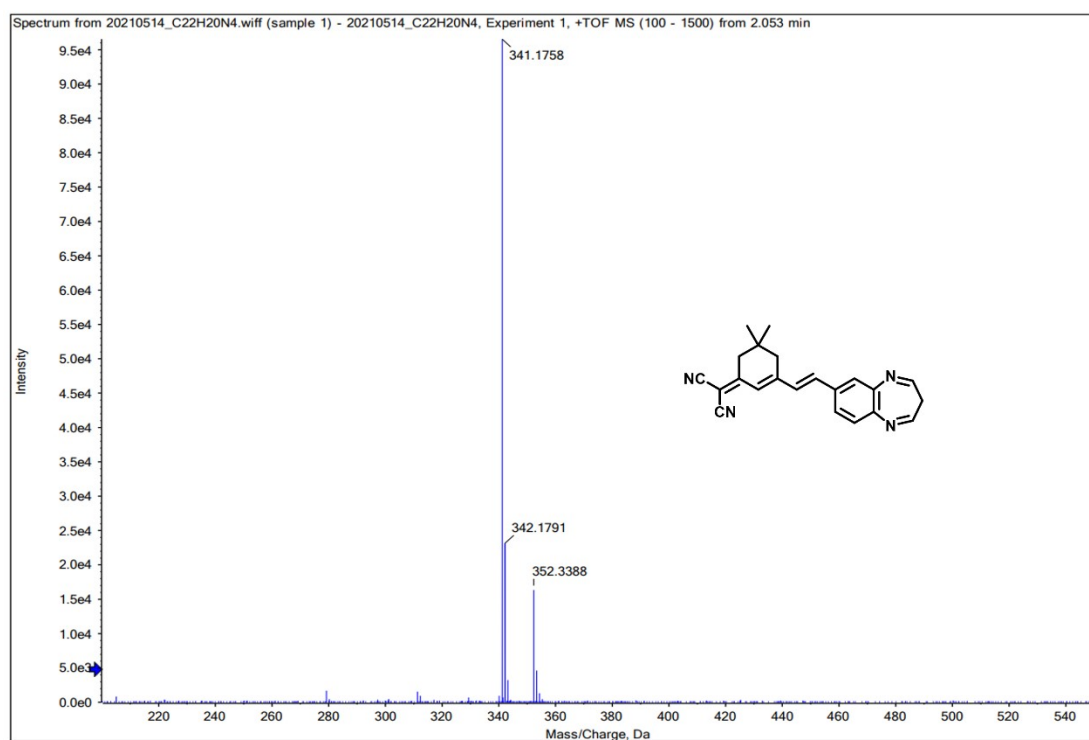

**Figure S2.** The MS of MDP was reacted with MDA. The new compound structure was shown in picture  $C_{22}H_{20}N_4 [M+H]^+$  341.1761 and found 341.1758.

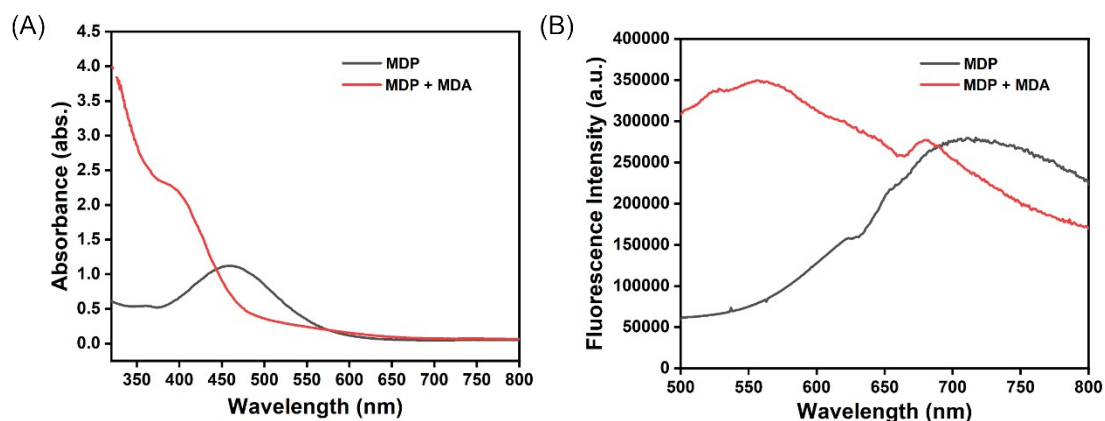

**Figure S3.** (A) The absorption spectra of MDP (10  $\mu$ M) reacted without or with MDA (150  $\mu$ M) in 10 mM PBS buffer (pH = 7.4, 1% DMSO, 2 mM CTAB) at 37  $^{\circ}$ C. (B) Fluorescence emission spectra of MDP (10  $\mu$ M) were recorded after reacting with MDA (150  $\mu$ M) in 10 mM PBS buffer for 30 minutes at 37  $^{\circ}$ C. mean  $\pm$  s.d.,  $n$  = 3 independent samples,  $\lambda_{\text{ex}}$  = 452 nm,  $d_{\text{em}} = d_{\text{ex}}$  = 10 nm.

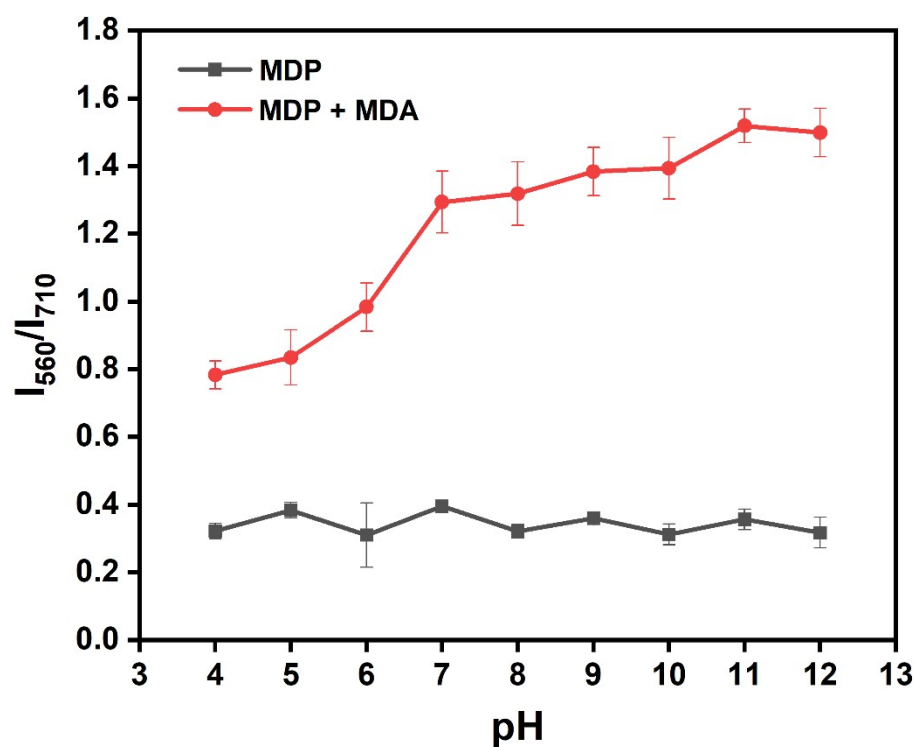

**Figure S4.** Fluorescence intensity ratio at  $I_{560}/I_{710}$  of MDP (10  $\mu$ M) after incubation with and without MDA (100  $\mu$ M) in different pH value PBS buffer (1% DMSO, 2 mM CTAB) at 37  $^{\circ}$ C.  $\lambda_{\text{ex}}$  = 452 nm,  $d_{\text{em}} = d_{\text{ex}}$  = 10 nm.

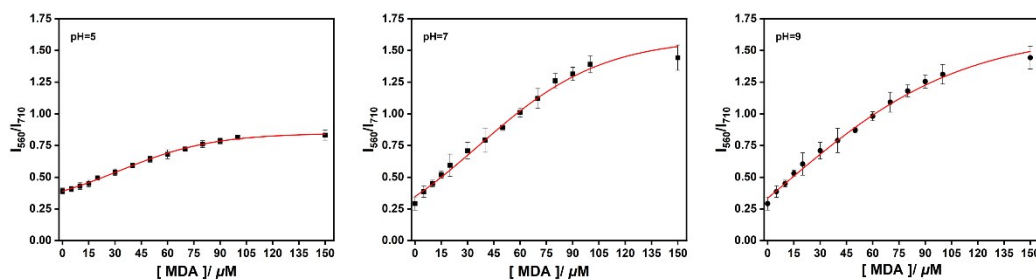

**Figure S5.** The fluorescence intensity ratio ( $I_{560}/I_{710}$ ) was recorded of MDP (10  $\mu\text{M}$ ) with the various concentrations of MDA (0 – 150  $\mu\text{M}$ ) in different pH value PBS buffer (10 mM, pH 5, 7, 9, containing 1% DMSO.  $\lambda_{\text{ex}}$  = 452 nm, slit: 10 nm/10 nm. The data represents the average of three independent experiments.

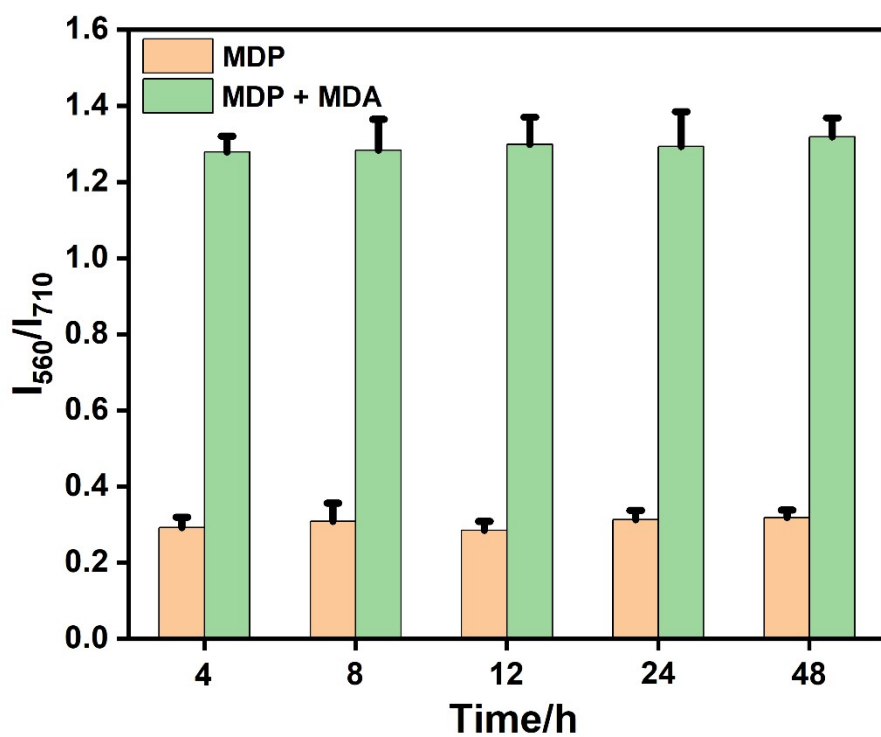

**Figure S6.** Fluorescence intensity ratio at  $I_{560}/I_{710}$  of MDP (10  $\mu\text{M}$ ) after incubation with and without MDA (100  $\mu\text{M}$ ) in PBS buffer (pH = 7.4, 1% DMSO, 2 mM CTAB) at 37 °C for different time. The time point: 4, 8, 12, 24, 48 h.  $\lambda_{\text{ex}}$  = 452 nm,  $d_{\text{em}}$  =  $d_{\text{ex}}$  = 10 nm.

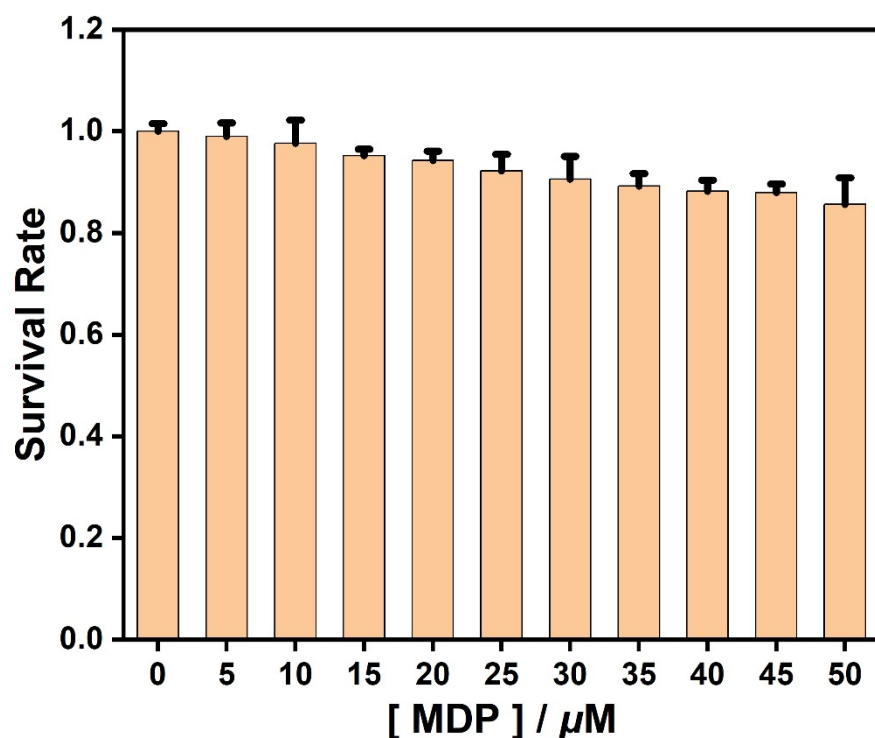

**Figure S7.** Cell viability of PC12 cells treated with MDP (0, 5, 10, 15, 20, 25, 30, 35, 40, 45, 50  $\mu\text{M}$ ).

Spectrum from 20210421\_LZ\_304.wiff (sample 1) - 20210421\_LZ\_304, Experiment 2, +TOF MS<sup>2</sup> (50 - 1500) from 6.451 min  
Precursor: 305.2 Da, CE: 35.0

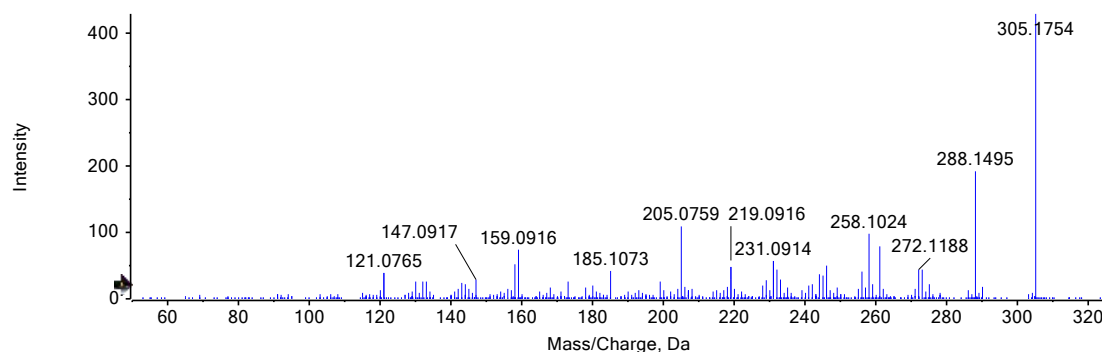

**Figure S8.** 30 min after the probe was injected into the tail vein, we euthanized the mice, retrieved their brain tissues, and added them to 1 mL of PBS buffer for homogenization. The homogenate was then centrifuged at 3500 rpm for 10 min to remove the supernatant. Subsequently, we added 1 mL of acetonitrile to precipitate excess proteins and impurities, followed by another centrifugation at 3500 rpm for 10 min. Finally, 200  $\mu\text{L}$  of the supernatant was collected. The MS value calculated for  $\text{C}_{19}\text{H}_{20}\text{N}_4$   $[\text{M}+\text{H}]^+$  305.1761 and found 305.1760.

### 3. $^1\text{H}$ NMR and $^{13}\text{C}$ NMR

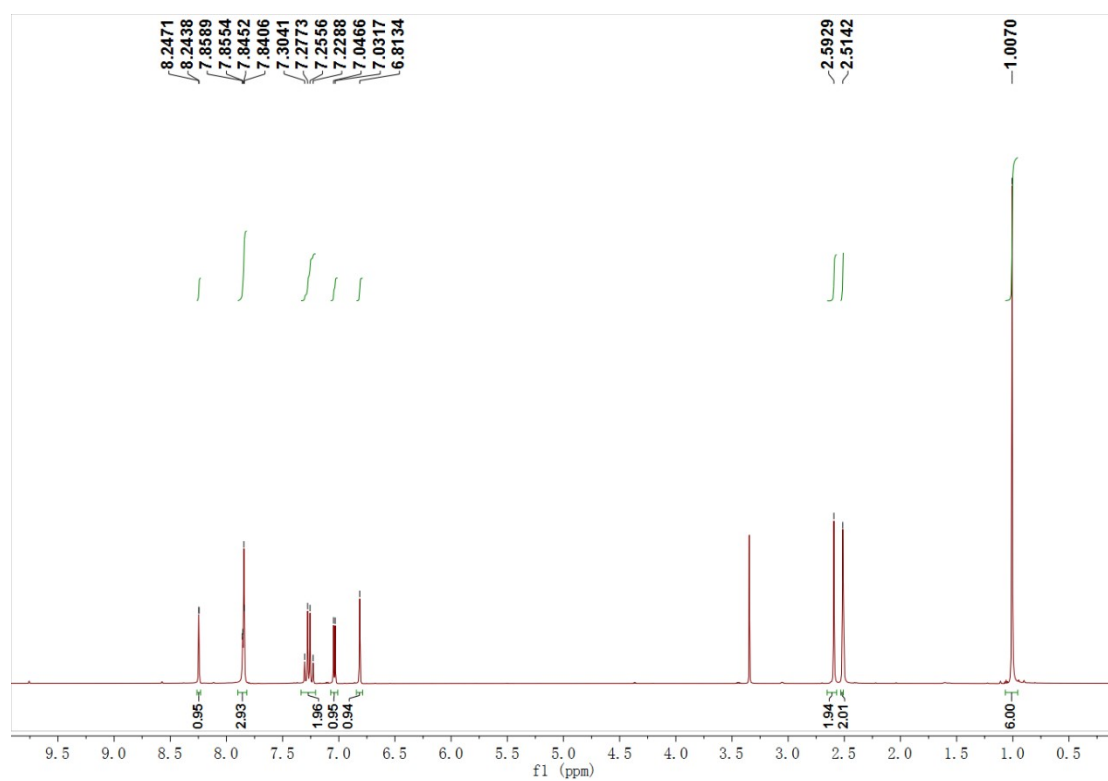

**Figure S9.**  $^1\text{H}$  NMR spectrum of compound **1** (DMSO- $d_6$ ).

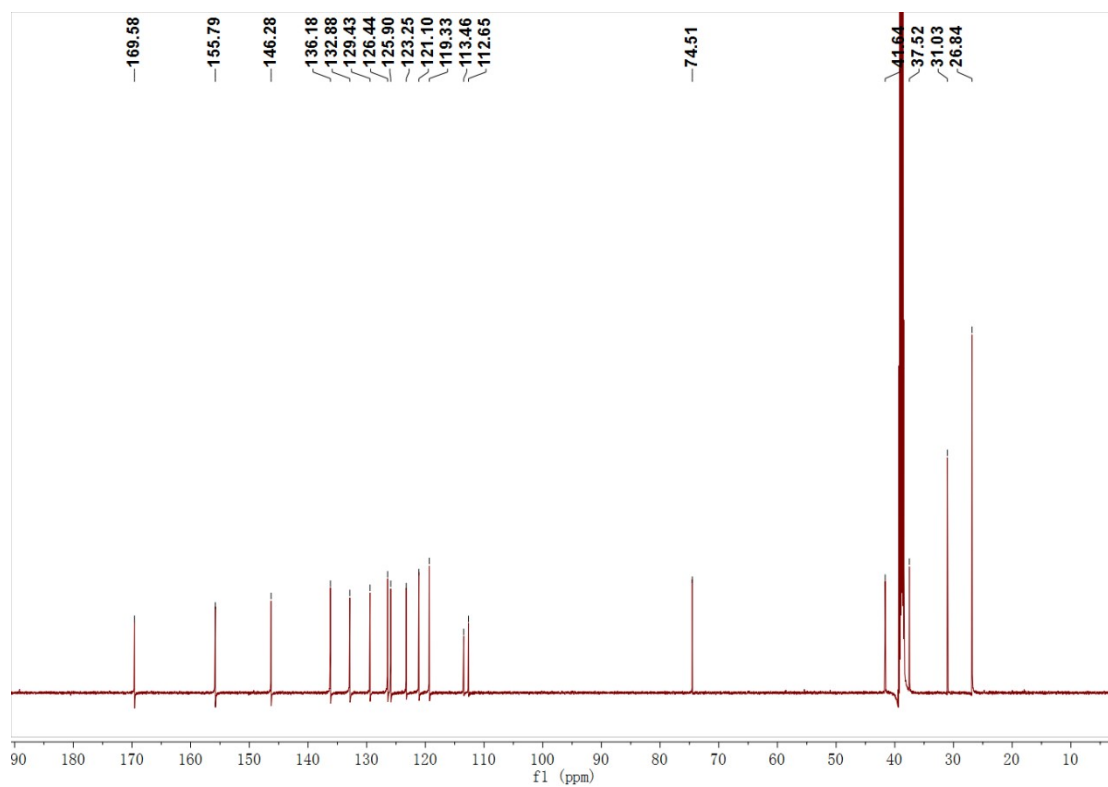

**Figure S10.**  $^{13}\text{C}$  NMR spectrum of compound **1** (DMSO- $d_6$ ).



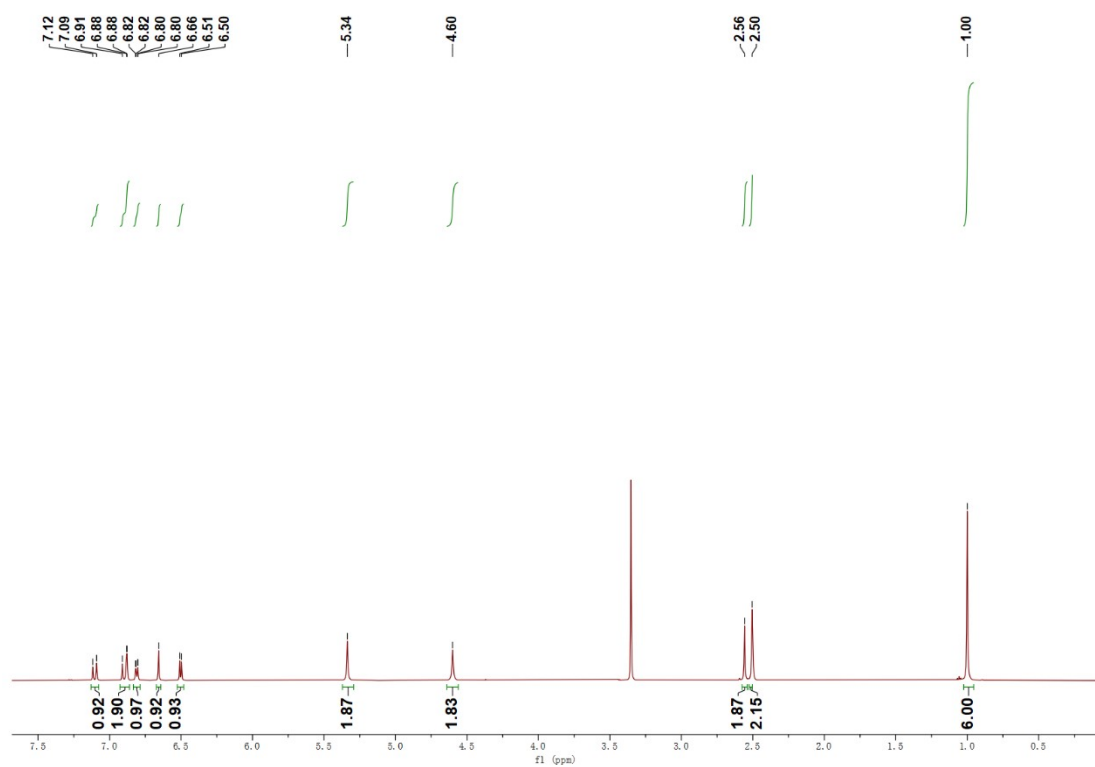

**Figure S11.** <sup>1</sup>H NMR spectrum of **MDP** (DMSO-*d*<sub>6</sub>).

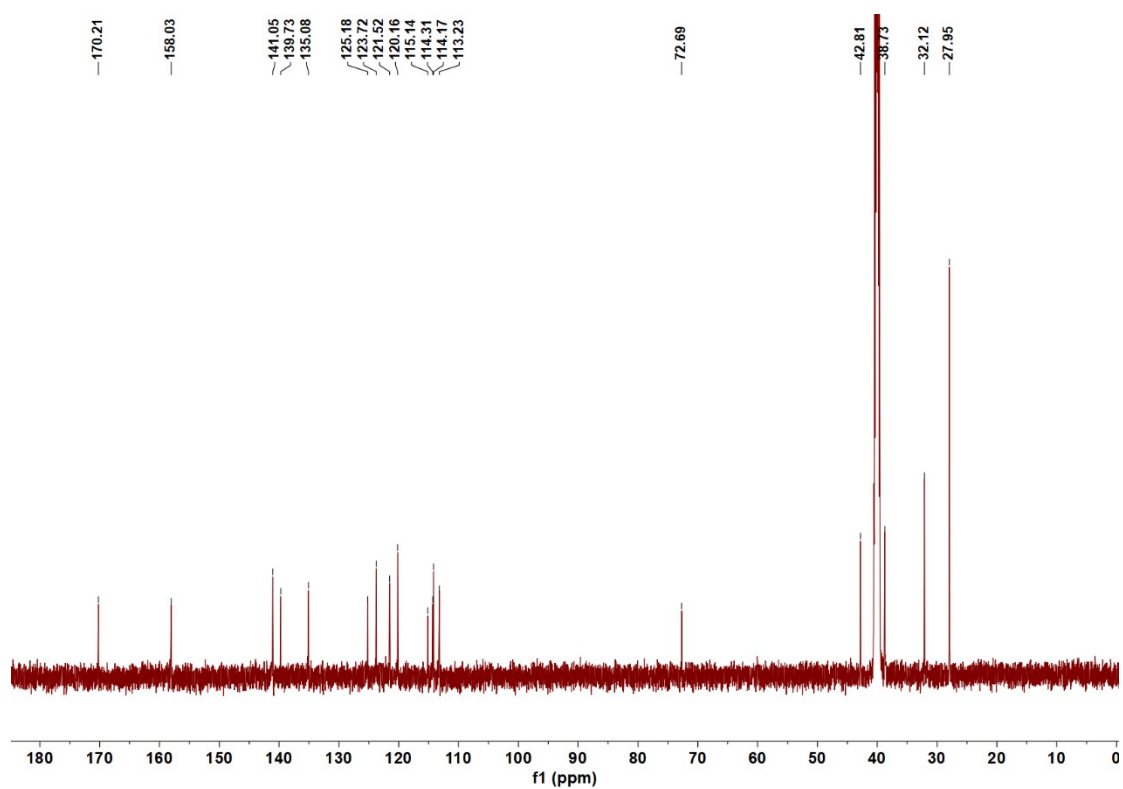

**Figure S12.** <sup>13</sup>C NMR spectrum of **MDP** (DMSO-*d*<sub>6</sub>).
